# Supplementary material for: Defective Connective Tissue Remodeling in Smad3 Mice Leads to Accelerated Aneurysmal Growth Through Disturbed Downstream TGF-β Signaling
Source: PubMed Central journal article supplement — eBioMedicine. 2016 Sep 10;12:280–94. doi: 10.1016/j.ebiom.2016.09.006 (PMC5078606; doi:10.1016/j.ebiom.2016.09.006), 2016-09-10
Supplement: mmc1.pdf [file mmc1.pdf]

Supplemental Material belonging to manuscript 'Defective connective tissue remodeling in Smad3 mice leads to accelerated aneurysmal growth through disturbed downstream TGF- $\beta$  signaling', van der Pluijm et al.

- Supplemental Figure 1
- Supplemental Figure 2
- Legends of supplemental figures and videos

**a**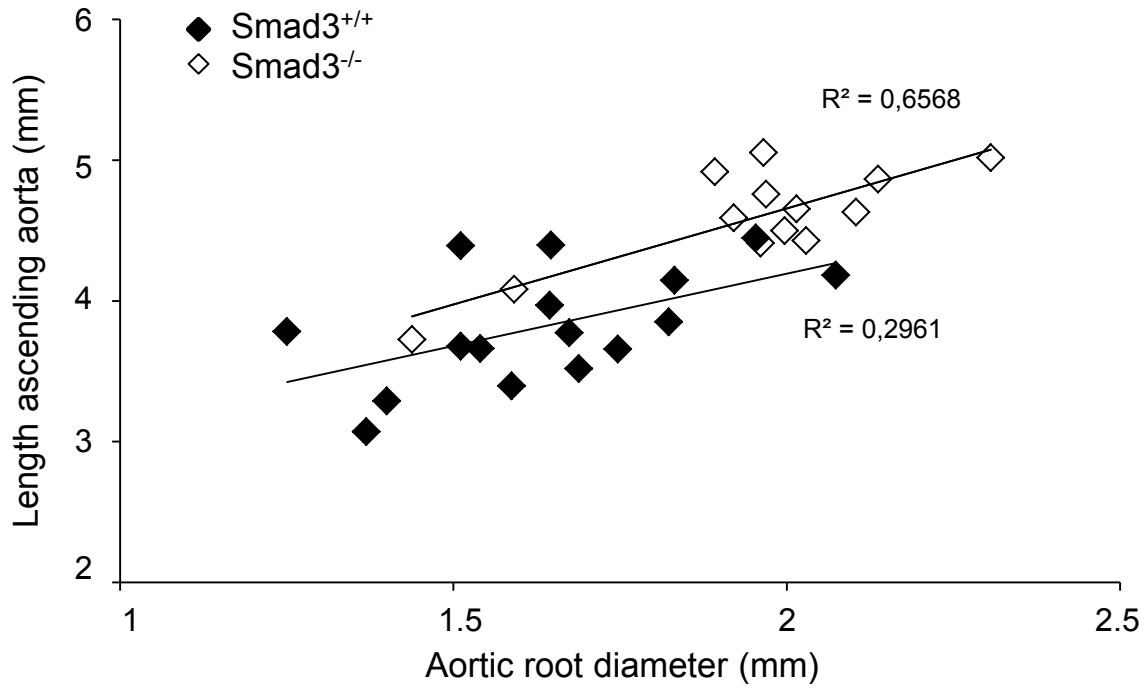**b**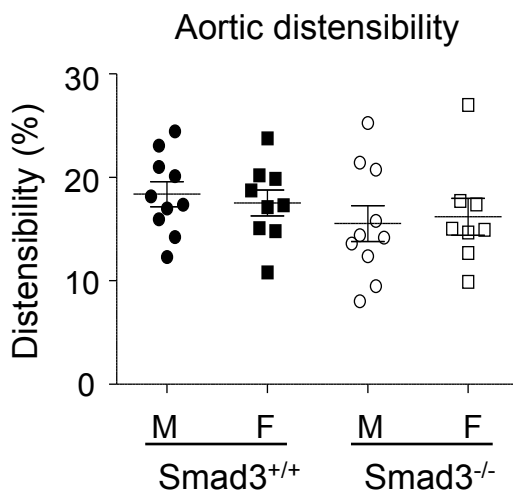

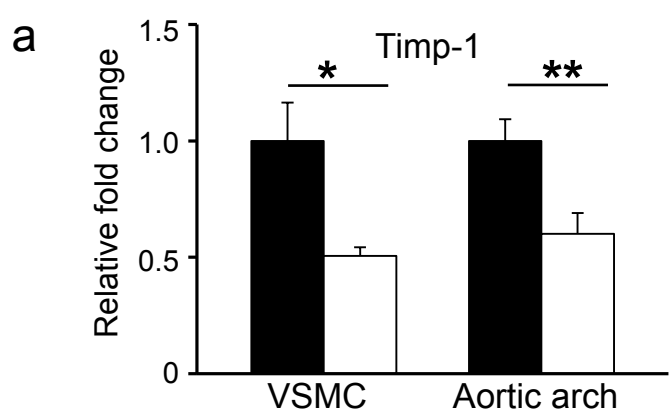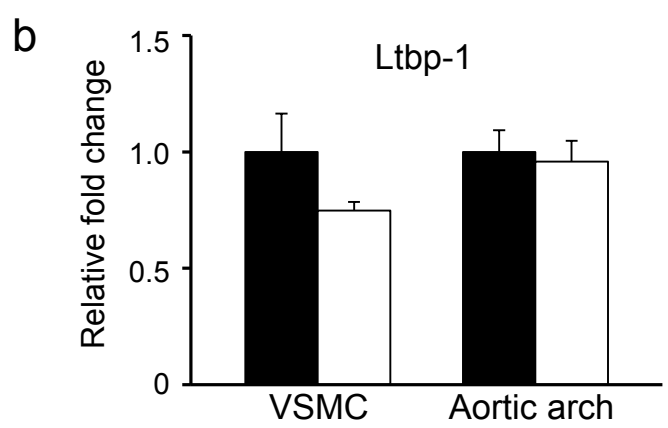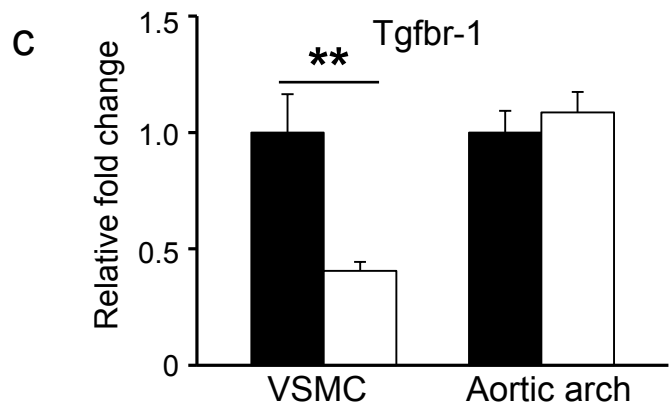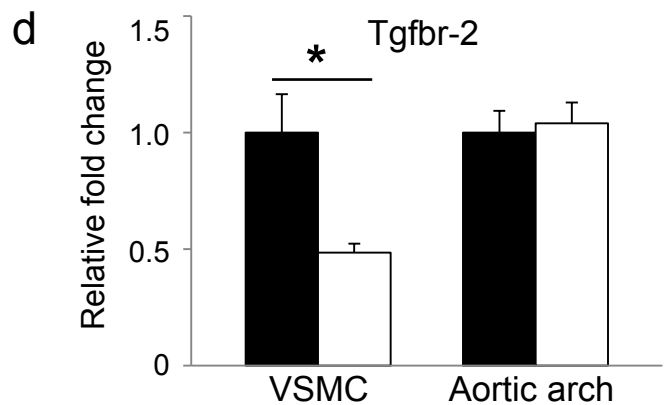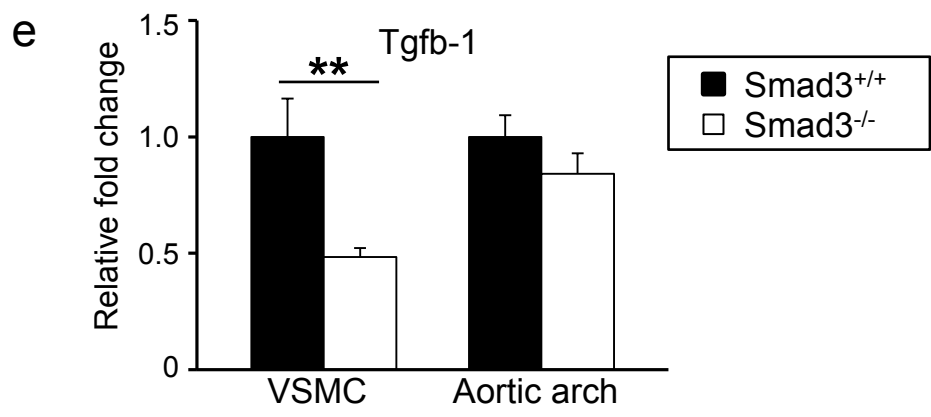

**Supplemental Figure 1. Aortic root diameter and aortic length correlation in *Smad3*<sup>-/-</sup> animals.** Aortic root diameter and aortic length measurements from all *Smad3*<sup>+/+</sup> and *Smad3*<sup>-/-</sup> animals (Figure 1) are depicted on the x- and y-axis, respectively. R<sup>2</sup> indicates the slope of simultaneous increase in aortic diameter and length. **B)** Quantification of aortic distensibility for *Smad3*<sup>+/+</sup> males (n=10), females (n=9) and *Smad3*<sup>-/-</sup> males (n=10), females (n=8) at age 6 weeks, showing no significant difference between the two groups.

**Supplemental Figure 2. Dysregulated TGF-β signaling in *Smad3*<sup>-/-</sup> VSMC and aortas** Real-time PCR analysis in *Smad3*<sup>-/-</sup> VSMC and aortic extracts compared to *Smad3*<sup>+/+</sup> shows downregulated mRNA levels of Timp-1 **A)**, and no significant change in **B)** Ltbp-1. mRNA levels of **C)** Tgfbr-1, **D)** Tgfbr-2 and **E)** Tgfb-1 were down regulated in *Smad3*<sup>-/-</sup> VSMCs compared to *Smad3*<sup>+/+</sup>, but not in aortic extracts. Fold changes are shown for *Smad3*<sup>-/-</sup> relative to *Smad3*<sup>+/+</sup>, \*p <0.05, \*\*p<0.01. The mean of three independent experiments are shown, n=9-12 per group.

## Video File Legends

**Video files supplement to Figure 2D. Rapid aneurysmal growth in *Smad3*<sup>-/-</sup> mice, not restricted to the aorta.** **D)** Representative μCT video files of CT pictures of a *Smad3*<sup>-/-</sup> female (3D CT rendering *Smad3*ko mouse) and its littermate *Smad3*<sup>+/+</sup> control (3D CT rendering WT mouse) in 3D rotating view.
